# Supplementary material for: Global root zone storage capacity from satellite-based evaporation
Source: Copernicus journal article supplement (doi:10.5194/hess-2015-533), 2016-01-15
Supplement: Supplementary file 1 [file hess-2015-533-supplement.zip]

Archive with 2 entries (2 files):
- uploaded/sr_data.zip
- uploaded/Supplementary Information.pdf
