# Supplementary material for: Global root zone storage capacity from satellite-based evaporation
Source: Copernicus journal article supplement (doi:10.5194/hess-2015-533), 2016-01-15
Supplement: Supplementary file 1 [file hess-2015-533-supplement.zip › uploaded/Supplementary Information.pdf]

# Supplementary Information

## 1 Supplementary figures

### 1.1 Supplementary table to Sect. 1 Introduction

**Table S1. Overview of rooting depth or root zone storage capacity estimate methods. See also Sect. 1.1.**

|                                   | Field observation based                                                                               | Look-up table                                                           | Root distribution modelling                                                          | Inverse modelling                          | Calibration                                                 | Mass balance based                                                                   |
|-----------------------------------|-------------------------------------------------------------------------------------------------------|-------------------------------------------------------------------------|--------------------------------------------------------------------------------------|--------------------------------------------|-------------------------------------------------------------|--------------------------------------------------------------------------------------|
| <b>Estimated variable</b>         | Actual root depths/profiles                                                                           | Root zone storage capacity                                              | (Hydrological) active root profiles                                                  | (Potential) hydrological active root depth | Hydrological root zone storage capacity                     | Hydrological root zone storage capacity                                              |
| <b>Spatial scale</b>              | Local, regional, global (scaled up from field observations)                                           | Regional, global                                                        | Local (Potential for scaling up)                                                     | Global/regional                            | Catchment (transferable to global scale by regionalisation) | Catchment, regional, global                                                          |
| <b>Type of model or algorithm</b> | Mean biome, regression model                                                                          | N/A                                                                     | Analytical, stochastic, genetic algorithm                                            | Vegetation model                           | Hydrological model                                          | Mass curve technique or cumulative mass balance                                      |
| <b>Required input data</b>        | Regression model requires climate, soil, and vegetation information                                   | Literature rooting depth, soil texture data                             | Climate, soil, and vegetation information                                            | Climate, soil, and vegetation information  | Climate and hydrological data                               | Runoff and/or evaporation demand, and precipitation                                  |
| <b>Main merits</b>                | - observation based                                                                                   | - grounded in literature<br>- facilitates land cover change experiments | - improves understanding of root distribution development                            | - Earth observation based                  | - compensates for model uncertainties                       | - observation based<br>- no need for soil and vegetation data<br>- model independent |
| <b>Main limitations</b>           | - Limited coverage of observations<br>- possible need to convert to active root zone storage capacity | - assumes that a single rooting depth is valid across a land cover type | - model dependent<br>- detailed input data required                                  | - model and data dependent                 | - model and data dependent<br>- parameter equifinality      | - dependent on hydrological data                                                     |
| <b>References (examples)</b>      | (Canadell et al., 1996; Jackson et al., 1996; Schenk and Jackson, 2009)                               | (Müller Schmied et al., 2014; Wang-Erlandsson et al., 2014)             | (Collins and Bras, 2007; Laio et al., 2006; Schenk, 2008; van Wijk and Bouten, 2001) | (Ichii et al., 2007; Kleidon, 2004)        | (Fenicia et al., 2009; Winsemius et al., 2009)              | (de Boer-Euser et al., n.d.; van Dijk et al., 2014; Gao et al., 2014), this study.   |

## 1.2 Supplementary figures to Sect. 2 Methods and Sect. 3 Data

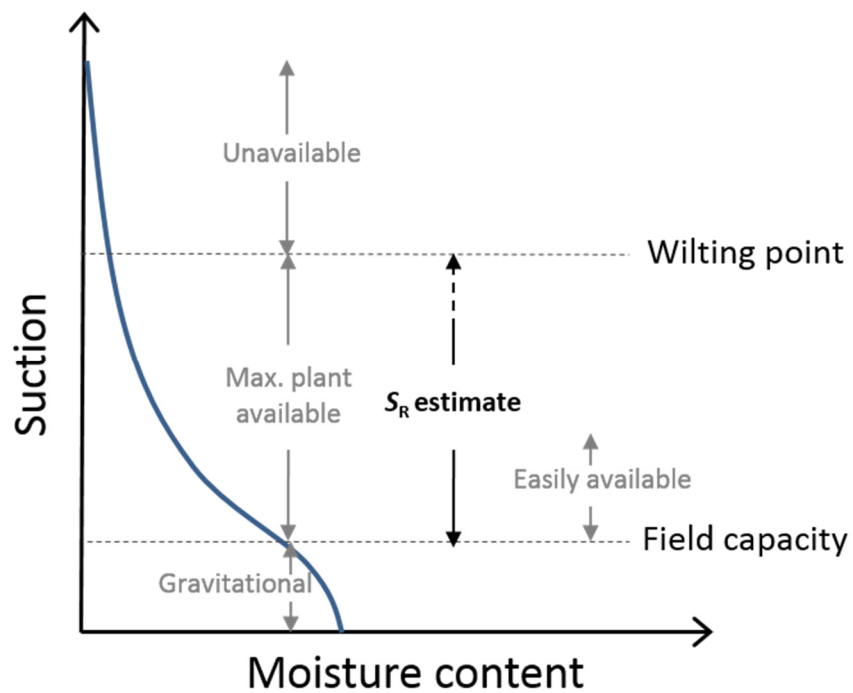

Figure S1.  $S_R$  estimate on the soil moisture retention curve. Ideally, the root zone storage capacity  $S_R$  correspond to the maximum plant available water. In case of a prolonged drought where all soil moisture is depleted. The estimated  $S_R$  is likely larger than the easily available moisture content and close to the maximum plant available moisture content. See also Sect. 2.1.

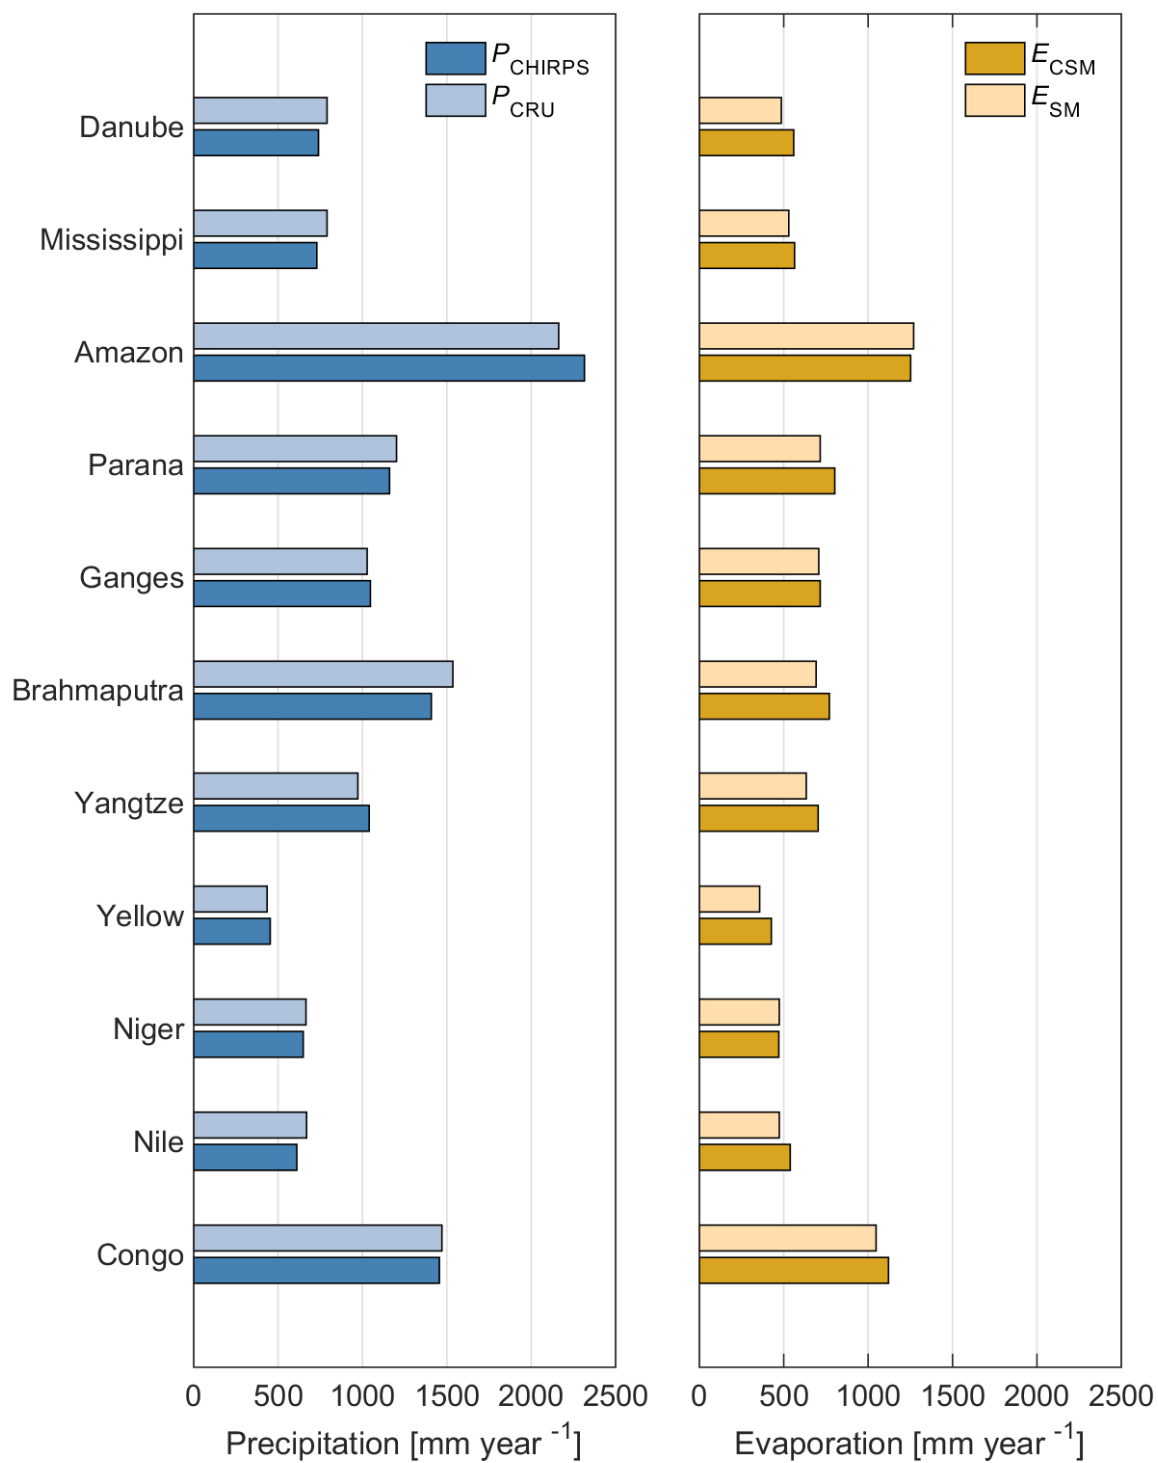

Figure S2. Mean annual precipitation and evaporation by river basins. See also Sect. 3.1.

### Land cover map - IGBP classification

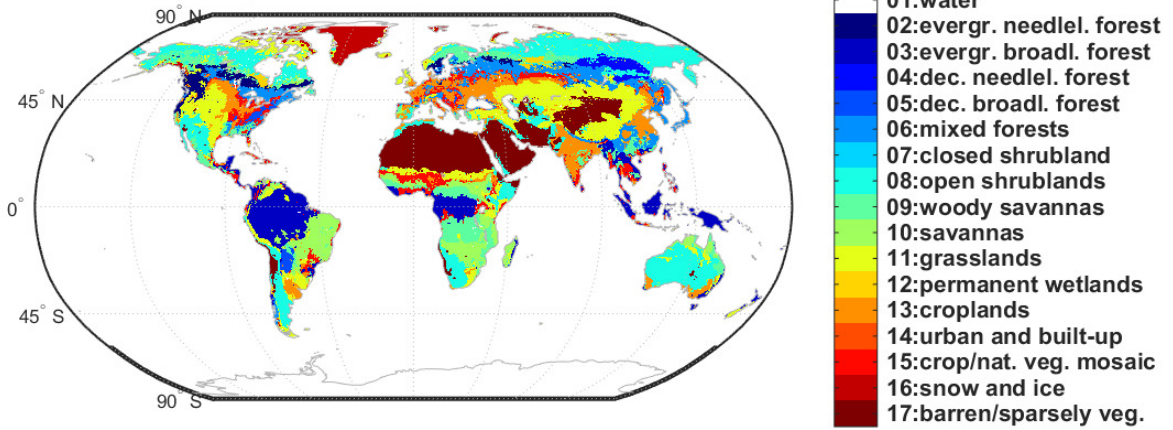

Figure S3. Land cover map (MCD12C1 from MODIS) used in this study showing the dominant land cover type in each grid cell.

### 1.3 Supplementary figures to Sect. 4 Results and discussion

RMSE improvements in simulated mean annual evaporation (i.e., the increase in similarity between a benchmark evaporation products  $E_{CSM}$  or  $E_{SM}$  and the simulated  $E$  by using  $S_{R,CRU-SM}$  or  $S_{R,CHIRPS-CSM}$  instead of  $S_{R,STEAM}$  as input to STEAM) were achieved for most of the world, see Figure S4. In particular, improvements are large in the southern mid-latitudes and in the tropical belt. Only in the northern mid-latitudes is  $E$  simulation performance worse independent of the data used. The RMSE improvements in  $E$  simulation are generally slightly higher with  $S_{R,CRU-SM}$  than with  $S_{R,CHIRPS-CSM}$ .

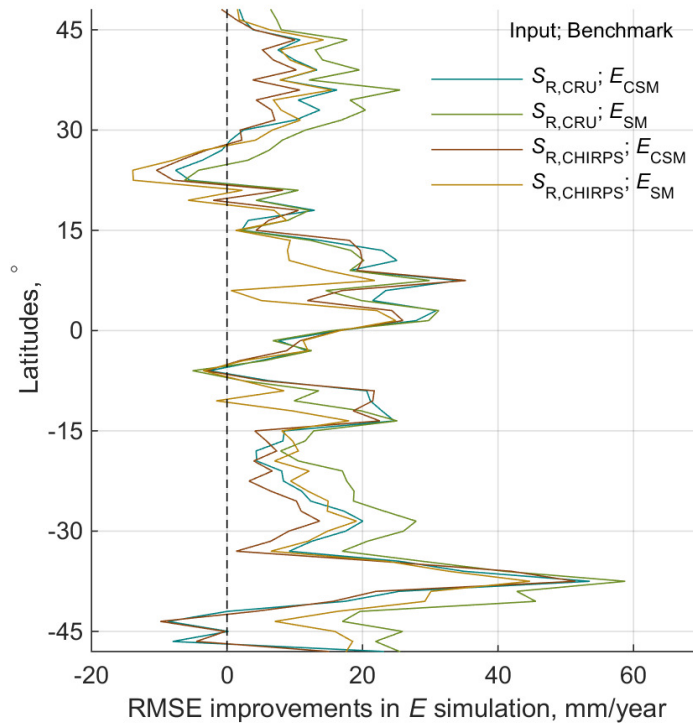

Figure S4. RMSE improvements of  $E$  simulation achieved by using  $S_{R,CRU}$  and  $S_{R,CHIRPS}$  as input to STEAM instead of  $S_{R,STEAM}$ .  $E_{CSM}$  and  $E_{SM}$  were used as benchmark for measuring improvements. See also Sect. 4.3.

## 2 Increasing performance in STEAM by Gumbel normalised $S_R$

### 2.1 Methods

As shown in Sect. 4.4, different land cover types seemed to increase E simulation in STEAM by Gumbel normalisation with different drought return years. A drought return period of 2 years ( $S_{R,CRU-SM,2yrs}$ ) offers the best evaporation simulation performance in woody savannahs, savannahs, croplands, grasslands, open shrublands, barren land, and deciduous broadleaf forest, whereas it tends to decrease the model performance in other forest types. Instead,  $S_{R,CRU-SM,5yrs}$  offers the highest performance in evergreen needleleaf forest, and  $S_{R,CRU-SM,10yrs}$  or  $S_{R,CRU-SM,20yrs}$  are best in evergreen broadleaf forests and mixed forest.

Thus, we create a root zone storage capacity map  $S_{R,CRU-SM,merged}$  that uses different drought return periods for different land cover types to increase performance in STEAM in principal based on Fig. 8. in Sect. 4.4. For water, urban land, and snow, where root zone storage capacity is not important, no Gumbel normalisation was applied. Table S2 shows the drought return periods matched to the different land cover types.

**Table S2. The drought return period applied to the different land cover types.**

| $S_R$                | Land cover type                                                                                                                                                                            |
|----------------------|--------------------------------------------------------------------------------------------------------------------------------------------------------------------------------------------|
| $S_{R,CRU-SM,2yrs}$  | 07:closed shrubland, 08:open shrublands, 09:woody savannas, 10:savannas, 11:grasslands,12:permanent wetlands,13:croplands, 15:cropland/natural veg. mosaic,17:barren or sparsely vegetated |
| $S_{R,CRU-SM,10yrs}$ | 02:evergreen needleleaf forest, 03:evergreen broadleaf forest, 06:mixed forests                                                                                                            |
| $S_{R,CRU-SM,60yrs}$ | 04:deciduous needleleaf forest, 05:deciduous broadleaf forest,                                                                                                                             |
| $S_{R,CRU-SM}$       | 01:water, 14:urban and built-up, 16:snow and ice                                                                                                                                           |

### 2.2 Results and discussion

Figure S5 shows a comparison between  $S_{R,CRU-SM}$  (the maximum value of the time series 2003-2013) and  $S_{R,CRU-SM,merged}$  (Gumbel normalisation with different drought return periods for different land cover types). The Gumbel normalisation reduces root zone storage capacity particularly in northern Australia, northern India, eastern Brazil, southern Bolivia, and eastern Africa.

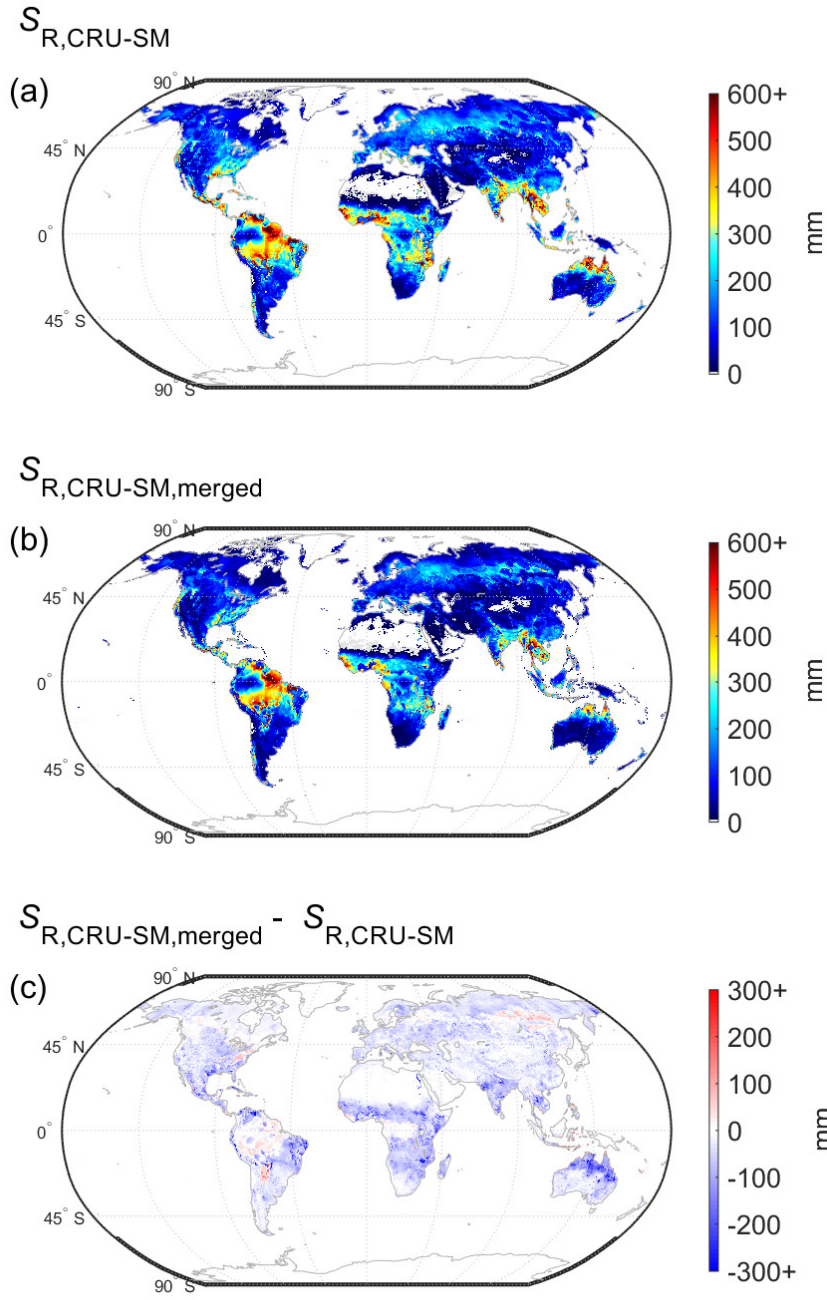

**Figure S5. The (a)  $S_{R,CRU-SM}$  (maximum storage deficit over the years 2003-2013), (b)  $S_{R,CRU-SM,merged}$  (merged using the best performing Gumbel normalised  $S_R$  for each land cover type), and (c) the difference  $S_{R,CRU-SM,merged}$  and  $S_{R,CRU-SM}$ .**

Figure S6 compares the STEAM-simulated evaporation when using, on the one hand,  $S_{R,CRU-SM,merged}$  and, on the other, the look-up table based  $S_{R,STEAM}$ . Similar to  $S_{R,CRU-SM}$  (Fig. 6),  $S_{R,CRU-SM,merged}$  has the greatest potential to influence model simulations for the hot and dry seasons, and for the seasonal tropical forests where the root zone storage capacity varies strongly. Compared to  $S_{R,CRU-SM}$  (Fig. 6),  $S_{R,CRU-SM,merged}$  causes greater reductions in evaporation in January south of Sahara, in April in Argentina, South Africa and Australia, and in July in Northern Hemisphere.

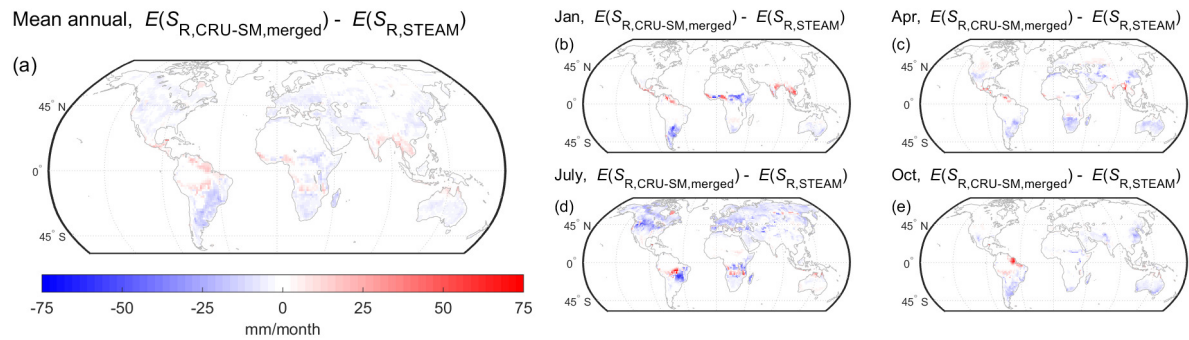

**Figure S6.** Difference in STEAM-simulated evaporation between using  $S_{R,CRU-SM,merged}$  and  $S_{R,STEAM}$  as root zone storage capacity parametrisation at (a) mean annual scale and averages for the months of (b) January, (c) April, (d) July, and (e) October over the time period 2003–2013. See also Sect. 4.3.

Overall, the total mean annual evaporation are not changed significantly by the use of the different root zone storage capacities  $S_{R,STEAM}$ ,  $S_{R,CRU-SM}$ , and  $S_{R,CRU-SM,merged}$ .  $S_{R,CRU-SM,merged}$  decreases the total evaporation by about 2200–2400 km<sup>3</sup>/year and transpiration ratio by 2–3 percentage points, see Table S3.

**Table S3.** Overview of STEAM-simulated mean annual evaporation and transpiration ratio (2003–2013) depending on the input root zone storage capacity  $S_{R,STEAM}$ ,  $S_{R,CRU-SM}$ , or  $S_{R,CRU-SM,merged}$ .

|                       | $E$ (km <sup>3</sup> /yr) | Transpiration ratio (%) |
|-----------------------|---------------------------|-------------------------|
| $S_{R,STEAM}$         | 73,460                    | 58                      |
| $S_{R,CRU-SM}$        | 73,660                    | 57                      |
| $S_{R,CRU-SM,merged}$ | 71,190                    | 55                      |

## References

- de Boer-Euser, T., McMillan, H. K., Hrachowitz, M., Winsemius, H. C. and Savenije, H. H. G.: Influence of soil and climate on root zone storage capacity, Water Resour. Res., n.d.
- Canadell, J., Jackson, R. B., Ehleringer, J. B., Mooney, H. a., Sala, O. E. and Schulze, E.-D.: Maximum rooting depth of vegetation types at the global scale, Oecologia, 108(4), 583–595, doi:10.1007/BF00329030, 1996.
- Collins, D. B. G. and Bras, R. L.: Plant rooting strategies in water-limited ecosystems, Water Resour. Res., 43(6), n/a–n/a, doi:10.1029/2006WR005541, 2007.
- van Dijk, A., Warren, G., Van Niel, T., Byrne, G., Pollock, D. and Doody, T.: Derivation of data layers from medium resolution remote sensing to support mapping of groundwater dependent ecosystems., 2014.
- Fenicia, F., Savenije, H. H. G. and Avdeeva, Y.: Anomaly in the rainfall-runoff behaviour of the Meuse catchment. Climate, land-use, or land-use management?, Hydrol. Earth Syst. Sci., 13(9), 1727–1737, doi:10.5194/hess-13-1727-2009, 2009.
- Gao, H., Hrachowitz, M., Schymanski, S. J., Fenicia, F., Sriwongsitanon, N. and Savenije, H. H. G.: Climate controls how ecosystems size the root zone storage capacity at catchment scale, Geophys. Res. Lett., 41(22), 7916–7923, doi:10.1002/2014GL061668, 2014.

- Harris, I., Jones, P. D., Osborn, T. J. and Lister, D. H.: Updated high-resolution grids of monthly climatic observations - the CRU TS3.10 dataset, *Int. J. Climatol.*, 34(3), 623–642, doi:10.1002/joc.3711, 2014.
- Ichii, K., HASHIMOTO, H., WHITE, M. a., Potter, C., HUTYRA, L. R., HUETE, A. R., Myneni, R. B. and Nemani, R. R.: Constraining rooting depths in tropical rainforests using satellite data and ecosystem modeling for accurate simulation of gross primary production seasonality, *Glob. Chang. Biol.*, 13(1), 67–77, doi:10.1111/j.1365-2486.2006.01277.x, 2007.
- Jackson, R. B., Canadell, J., Ehleringer, J. R., Mooney, H. A., Sala, O. E. and Schulze, E. D.: A global analysis of root distributions for terrestrial biomes, *Oecologia*, 108(3), 389–411, doi:10.1007/BF00333714, 1996.
- Kleidon, A.: Global datasets of rooting zone depth inferred from inverse methods, *J. Clim.*, 17(13), 2714–2722, doi:10.1175/1520-0442(2004)017<2714:GDORZD>2.0.CO;2, 2004.
- Laio, F., D’Odorico, P. and Ridolfi, L.: An analytical model to relate the vertical root distribution to climate and soil properties, *Geophys. Res. Lett.*, 33(18), L18401, doi:10.1029/2006GL027331, 2006.
- Müller Schmied, H., Eisner, S., Franz, D., Wattenbach, M., Portmann, F. T., Flörke, M. and Döll, P.: Sensitivity of simulated global-scale freshwater fluxes and storages to input data, hydrological model structure, human water use and calibration, *Hydrol. Earth Syst. Sci.*, 18(9), 3511–3538, doi:10.5194/hess-18-3511-2014, 2014.
- Schenk, H. J.: The shallowest possible water extraction profile: a null model for global root distributions, *Vadose Zo. J.*, 7(3), 1119, doi:10.2136/vzj2007.0119, 2008.
- Schenk, H. J. and Jackson, R. B.: ISLSCP II Ecosystem rooting depths, in ISLSCP Initiative II Collection, edited by F. G., G. Collatz, B. Meeson, S. Los, E. B. de Colstoun, and D. Landis, Oak Ridge National Laboratory Distributed Active Archive Center, Oak Ridge, Tennessee, U.S.A., 2009.
- Schneider, U., Becker, A., Finger, P., Meyer-Christoffer, Anja Rudolf, B. and Ziese, M.: GPCC full data reanalysis version 6.0 at 0.5: Monthly land-surface precipitation from rain-gauges built on GTS-based and historic data, , doi:10.5676/DWD\_GPCC/FD\_M\_V6\_050, 2011.
- Wang-Erlandsson, L., van der Ent, R. J., Gordon, L. J. and Savenije, H. H. G.: Contrasting roles of interception and transpiration in the hydrological cycle – Part 1: Temporal characteristics over land, *Earth Syst. Dyn.*, 5(2), 441–469, doi:10.5194/esd-5-441-2014, 2014.
- van Wijk, M. T. and Bouten, W.: Towards understanding tree root profiles: simulating hydrologically optimal strategies for root distribution, *Hydrol. Earth Syst. Sci.*, 5(4), 629–644, doi:10.5194/hess-5-629-2001, 2001.
- Winsemius, H. C., Schaefli, B., Montanari, A. and Savenije, H. H. G.: On the calibration of hydrological models in ungauged basins: A framework for integrating hard and soft hydrological information, *Water Resour. Res.*, 45(12), n/a–n/a, doi:10.1029/2009WR007706, 2009.
